# Supplementary material for: OH chemistry of non-methane organic gases (NMOGs) emitted from laboratory and ambient biomass burning smoke: evaluating the influence of furans and oxygenated aromatics on ozone and secondary NMOG formation
Source: Copernicus journal article supplement (doi:10.5194/acp-19-14875-2019), 2019-12-10
Supplement: Supplementary file 1 [file acp-19-14875-2019-supplement.zip]

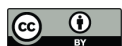

## *Supplement of*

# **OH chemistry of non-methane organic gases (NMOGs) emitted from laboratory and ambient biomass burning smoke: evaluating the influence of furans and oxygenated aromatics on ozone and secondary NMOG formation**

**Matthew M. Coggon et al.**

*Correspondence to:* Matthew M. Coggon ([matthew.m.coggon@noaa.gov](mailto:matthew.m.coggon@noaa.gov)) and Carsten Warneke ([carsten.warneke@noaa.gov](mailto:carsten.warneke@noaa.gov))

- [acp-19-14875-2019-supplement-title-page.pdf](#)
- [MCMv331\\_WithFurans\\_Coggon\\_et\\_al.fac](#)
- [acp-2019-516-supplement.pdf](#)
- [readme.txt](#)

The copyright of individual parts of the supplement might differ from the CC BY 4.0 License.
