# Supplementary material for: OH chemistry of non-methane organic gases (NMOGs) emitted from laboratory and ambient biomass burning smoke: evaluating the influence of furans and oxygenated aromatics on ozone and secondary NMOG formation
Source: Copernicus journal article supplement (doi:10.5194/acp-19-14875-2019), 2019-12-10
Supplement: Supplementary file 2 [file acp-19-14875-2019-supplement.zip]

## 1 Evaluating NOMOG Losses Through Metal Ductwork

As described in the main text, smoke was passed through metal ductwork before injection to the mini chamber. Deming et al. (2019) showed that surface partitioning is dependent on NMOG volatility, functionality, and displacement processes at adsorption sites. Prior to each small chamber experiment, the PTR-ToF-MS sampled NMOG directly from the stack, as described by Koss et al. (2018). To evaluate biases associated with NMOG transmission through the ductwork, we compare the distribution of NMOG measured from the stack with that inside the small chamber prior to the initiation of OH chemistry. Figure S15 shows the difference in NMOG profiles between small chamber and stack measurements (Small Chamber Bias =  $[\text{NMOG}_i/\text{CH}_3\text{CN}]_{\text{chamber}} - [\text{NMOG}_i/\text{CH}_3\text{CN}]_{\text{stack}}$ ). We normalize the NMOG distribution to  $\text{CH}_3\text{CN}$  under the assumption the acetonitrile is not lost to surfaces to a greater degree than other NMOG. The top row shows bias histograms for three fires, while the bottom row shows a comparison between the normalized profiles with 1:1, 1:2, and 2:1 lines.

In general, most NMOG fall within 20% of the 1:1 line. Bias histograms (top row, Fig. S15) show that the  $\text{NMOG}/\text{CH}_3\text{CN}$  ratios are lower in the small chamber, which suggests that NMOG are lost to the ductwork; however, this loss appears to be normally distributed and not weighted towards any specific NMOG functionality. Some masses exhibit significantly higher ratios with acetonitrile inside the small chamber (e.g. butenes, ethanol, formamide for F29); however, PTR-ToF-MS detection of these masses is poor due to contributions of fragments from higher masses (e.g. butene), or low sensitivity (e.g. ethanol).

Fig. S15 demonstrates that the relative NMOG distribution in the chamber is not significantly different from the NMOG distribution sampled from the stack. These results are consistent with the conclusions drawn by Lim et al. (2019), which showed that the volatility distribution was not significantly different between stack and mini chamber measurements.

## 2 Sensitivity of Modeled Secondary NMOG Formation to Furfural Branching Ratios

The reactions employed to represent furfural oxidation were estimated by Zhao and Wang (2017) via theoretical quantum chemistry calculations. To date, this mechanism has not been studied experimentally; consequently, the exact branching ratios of the three major pathways may differ from those used in this study (0.37 for channel A, 0.6 for channel B, and 0.03 for channel C, 6). Furfural plays a major role in the formation of secondary NMOG measured in the biomass burning plume described by Müller et al. (2016) and the assumed branching ratios may impact modeled formation of maleic anhydride, hydroxy furanone, and ozone.

Figure S16 shows model output of maleic anhydride, hydroxy furanone, and ozone for base case ( $A = 0.37$ ,  $B = 0.6$ ,  $C = 0.03$ ), equal weight (0.33, 0.33, 0.33), and isolated channel (i.e., all channel A, B, or C) simulations of the biomass burning plume described by Müller et al. (2016). Overall, hydroxy furanone formation is most sensitive to the assumed branching

ratio of channel B, which is the pathway that directly leads to hydroxy furanone formation (Fig. 6). Maleic anhydride is most sensitive to the assumed branching ratio of channel C; however, this sensitivity is weaker than that of hydroxy furanone since all pathways lead to a significant yield of maleic anhydride. The assumed branching ratios have little impact on ozone formation.

The sensitivity tests presented in Fig. S16 demonstrate the need for experimental evaluation of the furfural oxidation mechanism. This refinement may provide better constraints of important secondary NMOG; however, this will unlikely affect modeled ozone formation.

## References

- Aschmann, S. M., Nishino, N., Arey, J., and Atkinson, R.: Products of the OH Radical-Initiated Reactions of Furan, 2- and 3-Methylfuran, and 2,3- and 2,5-Dimethylfuran in the Presence of NO, *J. Phys. Chem. A.*, 118, 457–466, 2014.
- Atkinson, R., Baulch, D. L., Cox, R. A., Crowley, J. N., Hampson, R. F., Hynes, R. G., Jenkin, M. E., Rossi, M. J., Troe, J., and Subcommittee, I.: Evaluated kinetic and photochemical data for atmospheric chemistry: Volume II — gas phase reactions of organic species, *Atmospheric Chemistry and Physics*, 6, 3625–4055, <https://doi.org/10.5194/acp-6-3625-2006>, 2006.
- Burkholder, J., Sander, S., Abbatt, J., Barker, J., Huie, R., Kolb, C., Kurylo, M., Orkin, V., Wilmouth, D., and Wine, P.: Chemical Kinetics and Photochemical Data for Use in Atmospheric Studies, Evaluation No. 18, Jet Propulsion Laboratory, Pasadena, CA, 2015.
- Deming, B., Pagonis, D., Liu, X., Day, D., Talukdar, R., Krechmer, J., de Gouw, J. A., Jimenez, J. L., and Ziemann, P. J.: Measurements of Delays of Gas-Phase Compounds in a Wide Variety of Tubing Materials due to Gas-Wall Interactions, *Atmospheric Measurement Techniques Discussions*, 2019, 1–19, <https://doi.org/10.5194/amt-2019-25>, <https://www.atmos-meas-tech-discuss.net/amt-2019-25/>, 2019.
- Keller-Rudek, H., Moortgat, G. K., Sander, R., and Sörensen, R.: The MPI-Mainz UV/VIS Spectral Atlas of Gaseous Molecules of Atmospheric Interest, *Earth System Science Data*, 5, 365–373, <https://doi.org/10.5194/essd-5-365-2013>, <https://www.earth-syst-sci-data.net/5/365/2013/>, 2013.
- Koss, A. R., Sekimoto, K., Gilman, J. B., Selimovic, V., Coggon, M. M., Zarzana, K. J., Yuan, B., Lerner, B. M., Brown, S. S., Jimenez, J. L., Krechmer, J., Roberts, J. M., Warneke, C., Yokelson, R. J., and de Gouw, J.: Non-methane organic gas emissions from biomass burning: identification, quantification, and emission factors from PTR-ToF during the FIREX 2016 laboratory experiment, *Atmospheric Chemistry and Physics*, 18, 3299–3319, <https://doi.org/10.5194/acp-18-3299-2018>, 2018.
- Lauraguais, A., Coeur-Tourneur, C., Cassez, A., Deboudt, K., Fourmentin, M., and Choël, M.: Atmospheric reactivity of hydroxyl radicals with guaiacol (2-methoxyphenol), a biomass burning emitted compound: Secondary organic aerosol formation and gas-phase oxidation products, *Atmospheric Environment*, 86, 155–163, 2014.
- Lim, C. Y., Hagan, D. H., Coggon, M. M., Koss, A. R., Sekimoto, K., de Gouw, J., Warneke, C., Cappa, C. D., and Kroll, J. H.: Secondary organic aerosol formation from the laboratory oxidation of biomass burning emissions, *Atmospheric Chemistry and Physics*, 19, 12 797–12 809, <https://doi.org/10.5194/acp-19-12797-2019>, <https://www.atmos-chem-phys.net/19/12797/2019/>, 2019.
- Müller, M., Anderson, B. E., Beyersdorf, A. J., Crawford, J. H., Diskin, G. S., Eichler, P., Fried, A., Keutsch, F. N., Mikoviny, T., Thornhill, K. L., Walega, J. G., Weinheimer, A. J., Yang, M., Yokelson, R. J., and Wisthaler, A.: In situ measurements and modeling of reactive trace gases in a small biomass burning plume, *Atmospheric Chemistry and Physics*, 16, 3813–3824, 2016.
- Sekimoto, K., Li, S.-M., Yuan, B., Koss, A., Coggon, M., Warneke, C., and de Gouw, J.: Calculation of the sensitivity of proton-transfer-reaction mass spectrometry (PTR-MS) for organic trace gases using molecular properties, *International Journal of Mass Spectrometry*, 421, 71–94, 2017.
- Wolfe, G. M., Crounse, J. D., Parrish, J. D., St. Clair, J. M., Beaver, M. R., Paulot, F., Yoon, T. P., Wennberg, P. O., and Keutsch, F. N.: Photolysis, OH reactivity and ozone reactivity of a proxy for isoprene-derived hydroperoxyenals (HPALDs), *Phys. Chem. Chem. Phys.*, 14, 7276–7286, <https://doi.org/10.1039/C2CP40388A>, 2012.
- Zhao, X. and Wang, L.: Atmospheric Oxidation Mechanism of Furfural Initiated by Hydroxyl Radicals, *J. Phys. Chem. A.*, 121, 3247–3253, 2017.

**Table S1.** References and calculated photolysis frequencies for reactions used in the MCM v 3.3.1 during mini-chamber experiments. Photolysis frequencies are calculated as the product of the absorption cross section, quantum yield, and the scaled photon flux at 254 nm ( $4.5 \times 10^{15}$  photons  $\text{cm}^{-2}$ ). The ratio to  $j_{\text{NO}_2}$  is shown for ease of comparison.

| Absorbing Species         | MCM Reaction                                                                                           | MCM Name | Value ( $\text{s}^{-1}$ ) | $j / j_{\text{NO}_2}$ | Cross Section Database | Quantum Yield Ref.  | QY (254 nm) |
|---------------------------|--------------------------------------------------------------------------------------------------------|----------|---------------------------|-----------------------|------------------------|---------------------|-------------|
| ozone                     | $\text{O}_3 \rightarrow \text{O}_1\text{D}$                                                            | J1       | 4.5E-02                   | 885.38                | JPL                    | JPL                 | 0.9         |
| ozone                     | $\text{O}_3 \rightarrow \text{O}$                                                                      | J2       | 5.0E-03                   | 98.38                 | JPL                    | JPL                 | 0.1         |
| hydrogen peroxide         | $\text{H}_2\text{O}_2 \rightarrow \text{OH} + \text{OH}$                                               | J3       | 3.0E-04                   | 6.03                  | JPL                    | JPL                 | 1           |
| nitrogen dioxide          | $\text{NO}_2 \rightarrow \text{NO} + \text{O}$                                                         | J4       | 5.0E-05                   | 1.00                  | IUPAC                  | IUPAC               | 1           |
| nitrate radical           | $\text{NO}_3 \rightarrow \text{NO}_2 + \text{O}$                                                       | J5       | 4.9E-04                   | 9.79                  | Mainz                  | JPL                 | 1           |
| nitrate radical           | $\text{NO}_3 \rightarrow \text{NO}$                                                                    | J6       | 0                         | 0                     | Mainz                  | JPL                 | 0           |
| nitrous acid              | $\text{HONO} \rightarrow \text{OH} + \text{NO}$                                                        | J7       | 5.9E-04                   | 11.70                 | IUPAC                  | IUPAC               | 1           |
| nitric acid               | $\text{HNO}_3 \rightarrow \text{OH} + \text{NO}_2$                                                     | J8       | 8.5E-05                   | 1.68                  | JPL                    | IUPAC               | 1           |
| formaldehyde              | $\text{HCHO} \rightarrow \text{CO} + \text{HO}_2 + \text{HO}_2$                                        | J11      | 4.5E-06                   | 0.09                  | JPL                    | JPL                 | 0.3         |
| formaldehyde              | $\text{HCHO} \rightarrow \text{H}_2 + \text{CO}$                                                       | J12      | 7.5E-06                   | 0.15                  | IUPAC                  | JPL                 | 0.5         |
| acetaldehyde <sup>1</sup> | $\text{CH}_3\text{CHO} \rightarrow \text{CH}_3\text{O}_2 + \text{HO}_2 + \text{CO}$                    | J13      | 2.0E-05                   | 0.39                  | IUPAC                  | IUPAC               | 0.3         |
| propanal                  | $\text{C}_2\text{H}_5\text{CHO} \rightarrow \text{C}_2\text{H}_5\text{O}_2 + \text{HO}_2 + \text{CO}$  | J14      | 7.6E-05                   | 1.50                  | IUPAC                  | IUPAC               | 1           |
| butanal <sup>2</sup>      | $\text{C}_3\text{H}_7\text{CHO} \rightarrow \text{NC}_3\text{H}_7\text{O}_2 + \text{CO} + \text{HO}_2$ | J15      | 1.3E-05                   | 0.26                  | IUPAC                  | IUPAC               | 0.21        |
| butanal                   | $\text{C}_3\text{H}_7\text{CHO} \rightarrow \text{C}_2\text{H}_4 + \text{CH}_3\text{CHO}$              | J16      | 6.3E-06                   | 0.12                  | IUPAC                  | IUPAC               | 0.1         |
| 2-methylpropanal          | $\text{IPRCHO} \rightarrow \text{IC}_3\text{H}_7\text{O}_2 + \text{HO}_2 + \text{CO}$                  | J17      | 1.4E-05                   | 0.27                  | IUPAC                  | IUPAC               | 0.25        |
| methacrolein <sup>2</sup> | $\text{MACR} \rightarrow \text{CH}_3\text{C}_2\text{H}_5\text{O}_2 + \text{CO} + \text{HO}_2$          | J18      | 3.9E-07                   | 0.01                  | IUPAC                  | JPL                 | 0.05        |
| methacrolein              | $\text{MACR} \rightarrow \text{MACO}_3 + \text{HO}_2$                                                  | J19      | 3.9E-07                   | 0.01                  | IUPAC                  | JPL                 | 0.05        |
| (C5)-HPALD                | $\text{C}_5\text{HPALD1} \rightarrow \text{products}$                                                  | J20      | 7.7E-06                   | 0.15                  | IUPAC                  | Wolfe et al. (2012) | 1           |
|                           | $\text{C}_5\text{HPALD2} \rightarrow \text{products}$                                                  |          |                           |                       |                        |                     |             |
| acetone <sup>1</sup>      | $\text{CH}_3\text{COCH}_3 \rightarrow \text{CH}_3\text{CO}_3 + \text{CH}_3\text{O}_2$                  | J21      | 5.6E-05                   | 1.11                  | IUPAC                  | IUPAC               | 0.42        |
| methyl ethyl ketone       | $\text{MEK} \rightarrow \text{CH}_3\text{CO}_3 + \text{C}_2\text{H}_5\text{O}_2$                       | J22      | 4.6E-05                   | 0.90                  | IUPAC                  | IUPAC               | 0.34        |
| methyl vinyl ketone       | $\text{MVK} \rightarrow \text{C}_3\text{H}_6 + \text{CO}$                                              | J23      | 4.0E-06                   | 0.08                  | IUPAC                  | IUPAC               | 0.38        |
| methyl vinyl ketone       | $\text{MVK} \rightarrow \text{CH}_3\text{CO}_3 + \text{HCHO} + \text{CO} + \text{HO}_2$                | J24      | 4.0E-06                   | 0.08                  | IUPAC                  | IUPAC               | 0.38        |
| glyoxal                   | $\text{GLYOX} \rightarrow \text{CO} + \text{CO} + \text{H}_2$                                          | J31      | 3.6E-05                   | 0.71                  | JPL                    | JPL                 | 0.52        |
| glyoxal                   | $\text{GLYOX} \rightarrow \text{HCHO} + \text{CO}$                                                     | J32      | 2.3E-05                   | 0.45                  | JPL                    | JPL                 | 0.33        |
| glyoxal                   | $\text{GLYOX} \rightarrow \text{CO} + \text{CO} + \text{HO}_2 + \text{HO}_2$                           | J33      | 1.1E-05                   | 0.21                  | JPL                    | JPL                 | 0.16        |
| methyl glyoxal            | $\text{MGLYOX} \rightarrow \text{CH}_3\text{CO}_3 + \text{CO} + \text{HO}_2$                           | J34      | 1.2E-04                   | 2.37                  | JPL                    | JPL                 | 1           |
| biacetyl                  | $\text{BIACET} \rightarrow \text{CH}_3\text{CO}_3 + \text{CH}_3\text{CO}_3$                            | J35      | 2.6E-05                   | 0.51                  | IUPAC                  | IUPAC               | 0.158       |
| methyl hydroperoxide      | $\text{CH}_3\text{OOH} \rightarrow \text{CH}_3\text{O} + \text{OH}$                                    | J41      | 1.5E-04                   | 2.90                  | IUPAC                  | IUPAC               | 1           |
| methyl nitrate            | $\text{CH}_3\text{NO}_3 \rightarrow \text{CH}_3\text{O} + \text{NO}_2$                                 | J51      | 1.5E-04                   | 2.88                  | IUPAC                  | IUPAC               | 1           |
| ethyl nitrate             | $\text{C}_2\text{H}_5\text{NO}_3 \rightarrow \text{C}_2\text{H}_5\text{O} + \text{NO}_2$               | J52      | 1.8E-04                   | 3.59                  | IUPAC                  | IUPAC               | 1           |
| propyl nitrate            | $\text{NC}_3\text{H}_7\text{NO}_3 \rightarrow \text{NC}_3\text{H}_7\text{O} + \text{NO}_2$             | J53      | 1.9E-04                   | 3.85                  | IUPAC                  | IUPAC               | 1           |
| isopropyl nitrate         | $\text{IC}_3\text{H}_7\text{NO}_3 \rightarrow \text{IC}_3\text{H}_7\text{O} + \text{NO}_2$             | J54      | 2.2E-04                   | 4.30                  | IUPAC                  | IUPAC               | 1           |

JPL - Burkholder et al. (2015) (<https://jpldataeval.jpl.nasa.gov/>)

IUPAC - Atkinson et al. (2006) (<http://iupac.pole-ether.fr/index.html>)

Mainz - Keller-Rudek et al. (2013) ([www.uv-vis-spectral-atlas-mainz.org](http://www.uv-vis-spectral-atlas-mainz.org))

<sup>1</sup> Additional photolysis reactions added to account for losses at 254 nm (see Table S2)

<sup>2</sup> No Data for QY available at 254 nm; assume highest value reported at higher wavelengths

**Table S2.** Same as Table S1, but for reactions that are likely to be important in the mini-chamber that are not represented in MCM v 3.3.1.

| Absorbing Species    | MCM Reaction                                                                 | MCM Name | Value ( $s^{-1}$ ) | $j/j_{NO_2}$ | Cross Section Database | Quantum Yield Ref.    | QY (254 nm) |
|----------------------|------------------------------------------------------------------------------|----------|--------------------|--------------|------------------------|-----------------------|-------------|
| benzaldehyde         | BENZAL $\rightarrow$ HO2 + C6H5CO3<br>BENZAL $\rightarrow$ HO2 + CO + C6H5O2 | Jn2      | 1.1E-03            | 21.30        | IUPAC                  | IUPAC                 | 0.3         |
| acetaldehyde         | CH3CHO $\rightarrow$ CH4 + CO                                                | Jn5      | 3.0E-05            | 0.60         | IUPAC                  | IUPAC                 | 0.46        |
| acetaldehyde         | CH3CHO $\rightarrow$ CH3CO3 + HO2                                            | Jn6      | 7.9E-06            | 0.16         | IUPAC                  | IUPAC                 | 0.12        |
| 2-furfural           | FURFURAL $\rightarrow$ FURAN + CO<br>FURFURAL $\rightarrow$ C3H4 + CO + CO   | Jn7      | 1.3E-01            | 2646.26      | Mainz                  | Estimate <sup>1</sup> | 0.6         |
| acetone              | CH3COCH3 $\rightarrow$ CH3O2 + CH3O2 + CO                                    | Jn8      | 2.7E-05            | 0.53         | IUPAC                  | IUPAC                 | 0.2         |
| peroxyacetyl nitrate | PAN $\rightarrow$ CH3CO3 + NO2                                               | Jn14     | 3.2E-04            | 6.41         | IUPAC                  | IUPAC                 | 0.745       |
| peroxyacetyl nitrate | PAN $\rightarrow$ CH3O2 + NO3                                                | Jn15     | 1.1E-04            | 2.23         | IUPAC                  | IUPAC                 | 0.26        |
| methoxy nitrate      | CH3O2NO2 $\rightarrow$ CH3O2 + NO2                                           | Jn16     | 1.4E-03            | 27.26        | IUPAC                  | Estimate              | 0.95        |
| methoxy nitrate      | CH3O2NO2 $\rightarrow$ CH3O + NO3                                            | Jn17     | 7.2E-05            | 1.43         | IUPAC                  | Estimate              | 0.05        |
| dinitrogen pentoxide | N2O5 $\rightarrow$ NO3 + NO2                                                 | Jn19     | 2.8E-04            | 5.58         | IUPAC                  | IUPAC                 | 0.2         |
| dinitrogen pentoxide | N2O5 $\rightarrow$ NO3 + NO + O                                              | Jn20     | 8.8E-04            | 17.51        | IUPAC                  | IUPAC                 | 0.6         |
| HO2NO2               | HO2NO2 $\rightarrow$ HO2 + NO2                                               | Jn21     | 9.2E-04            | 18.32        | IUPAC                  | IUPAC                 | 0.59        |
| HO2NO2               | HO2NO2 $\rightarrow$ OH + NO3                                                | Jn22     | 6.4E-04            | 12.73        | IUPAC                  | IUPAC                 | 0.41        |

JPL - Burkholder et al. (2015) (<https://jpldataeval.jpl.nasa.gov/>)

IUPAC - Atkinson et al. (2006) (<http://iupac.pole-ether.fr/index.html>)

Mainz - Keller-Rudek et al. (2013) ([www.uv-vis-spectral-atlas-mainz.org](http://www.uv-vis-spectral-atlas-mainz.org))

<sup>1</sup> Personal communication with V. Papadimitriou

**Table S3.** Rate constant parameters, photolysis frequency, and initial conditions for the species modeled in F26 and F38. Entries are ordered by mixing ratios measured during F38. Photolysis frequencies are calculated based on literature cross-sections, known/estimated quantum yields, and the scaled photon flux at 254 nm ( $4.5 \times 10^{15}$  photons  $\text{cm}^2$ ).

|                            | MCM Name   | $k_{\text{OH}}$ ( $\text{cm}^3 \text{ molec}^{-1} \text{ s}^{-1}$ ) | $k_{\text{O}_3}$ ( $\text{cm}^3 \text{ molec}^{-1} \text{ s}^{-1}$ ) | $k_{\text{NO}_3}$ ( $\text{cm}^3 \text{ molec}^{-1} \text{ s}^{-1}$ ) | $j$ ( $\text{s}^{-1}$ ) | F26 (ppb) | F38 (ppb) |
|----------------------------|------------|---------------------------------------------------------------------|----------------------------------------------------------------------|-----------------------------------------------------------------------|-------------------------|-----------|-----------|
| <b>Butanol-d9</b>          | DBUTANOL   | 3.40E-12                                                            | 0                                                                    | 0                                                                     | 0                       | 37.26     | 44.86     |
| <b>Formaldehyde</b>        | HCHO       | 8.47E-12                                                            | 0                                                                    | 5.50E-16                                                              | 1.20E-05                | 14.07     | 17.84     |
| <b>1-butene</b>            | BUT1ENE    | 3.11E-11                                                            | 1.06E-17                                                             | 1.35E-14                                                              | 0                       | 4.53      | 13.84     |
| <b>Methanol</b>            | CH3OH      | 9.02E-13                                                            | 0                                                                    | 0                                                                     | 0                       | 22.23     | 11.79     |
| <b>Ethene</b>              | C2H4       | 7.74E-12                                                            | 1.68E-18                                                             | 2.24E-16                                                              | 0                       | 9.22      | 8.38      |
| <b>Acetaldehyde</b>        | CH3CHO     | 1.48E-11                                                            | 0                                                                    | 2.84E-15                                                              | 1.98E-05                | 15.44     | 7.86      |
| <b>Acetic Acid</b>         | CH3CO2H    | 8.00E-13                                                            | 0                                                                    | 0                                                                     | 0                       | 7.64      | 6.03      |
| <b>Ethyne</b>              | C2H2       | 7.46E-13                                                            | 0                                                                    | 0                                                                     | 0                       | 4.97      | 5.96      |
| <b>Formic Acid</b>         | HCOOH      | 4.50E-13                                                            | 0                                                                    | 0                                                                     | 0                       | 3.89      | 4.86      |
| <b>Acrolein</b>            | ACR        | 2.00E-11                                                            | 2.90E-19                                                             | 3.26E-15                                                              | 3.86E-07                | 3.24      | 4.43      |
| <b>1-propene</b>           | C3H6       | 2.83E-11                                                            | 1.04E-17                                                             | 9.79E-15                                                              | 0                       | 7.52      | 2.64      |
| <b>2-furfural</b>          | FURFURAL   | 3.50E-11                                                            | 0                                                                    | 0                                                                     | 1.34E-01                | 2.07      | 2.03      |
| <b>Acetone</b>             | CH3COCH3   | 1.78E-13                                                            | 0                                                                    | 0                                                                     | 8.3E-05                 | 5.60      | 1.95      |
| <b>Furan</b>               | FURAN      | 4.20E-11                                                            | 0                                                                    | 0                                                                     | 0                       | 2.26      | 1.87      |
| <b>Furanone</b>            | BZFUONE    | 4.45E-11                                                            | 2.20E-19                                                             | 3.00E-13                                                              | 0                       | 1.77      | 1.73      |
| <b>2,3-butanedione</b>     | BIACET     | 2.41E-13                                                            | 0                                                                    | 0                                                                     | 2.55E-05                | 2.09      | 1.66      |
| <b>1,3-butadiene</b>       | C4H6       | 6.59E-11                                                            | 6.64E-18                                                             | 1.03E-13                                                              | 0                       | 2.40      | 1.42      |
| <b>Ethanol</b>             | C2H5OH     | 3.21E-12                                                            | 0                                                                    | 0                                                                     | 0                       | 1.63      | 1.34      |
| <b>Glyoxal</b>             | GLYOX      | 9.63E-12                                                            | 0                                                                    | 2.84E-15                                                              | 6.95E-05                | 0.98      | 1.25      |
| <b>Hydroxyacetone</b>      | ACETOL     | 4.42E-12                                                            | 0                                                                    | 0                                                                     | 4.55E-05                | 1.30      | 1.12      |
| <b>Guaiacol</b>            | GUAIACOL   | 7.44E-11                                                            | 0                                                                    | 0                                                                     | 0                       | 2.94      | 1.10      |
| <b>5-methylfurfural</b>    | MEFURFURAL | 5.10E-11                                                            | 0                                                                    | 0                                                                     | 0                       | 1.45      | 1.00      |
| <b>Catechol</b>            | CATECHOL   | 1.00E-10                                                            | 9.20E-18                                                             | 9.90E-11                                                              | 0                       | 1.45      | 1.00      |
| <b>Phenol</b>              | PHENOL     | 2.74E-11                                                            | 0                                                                    | 3.80E-12                                                              | 0                       | 2.39      | 0.89      |
| <b>Methyl acetate</b>      | METHACET   | 3.50E-13                                                            | 0                                                                    | 0                                                                     | 0                       | 1.03      | 0.89      |
| <b>Propenoic acid</b>      | ACO2H      | 8.66E-12                                                            | 0                                                                    | 0                                                                     | 0                       | 0.87      | 0.86      |
| <b>Methyl vinyl ketone</b> | MVK        | 1.99E-11                                                            | 5.36E-18                                                             | 0                                                                     | 8.06E-06                | 0.99      | 0.81      |

**Table S3.** (Continued)

|                            | MCM Name   | $k_{\text{OH}}$ ( $\text{cm}^3 \text{ molec}^{-1} \text{ s}^{-1}$ ) | $k_{\text{O}_3}$ ( $\text{cm}^3 \text{ molec}^{-1} \text{ s}^{-1}$ ) | $k_{\text{NO}_3}$ ( $\text{cm}^3 \text{ molec}^{-1} \text{ s}^{-1}$ ) | $j$ ( $\text{s}^{-1}$ ) | F26 (ppb) | F38 (ppb) |
|----------------------------|------------|---------------------------------------------------------------------|----------------------------------------------------------------------|-----------------------------------------------------------------------|-------------------------|-----------|-----------|
| <b>o-cresol</b>            | CRESOL     | 4.65E-11                                                            | 0                                                                    | 1.40E-11                                                              | 0                       | 2.58      | 0.79      |
| <b>alpha-pinene</b>        | APINENE    | 5.20E-11                                                            | 9.53E-17                                                             | 6.15E-12                                                              | 0                       | 0.76      | 0.78      |
| <b>Methyl glyoxal</b>      | MGLYOX     | 1.29E-11                                                            | 0                                                                    | 6.82E-15                                                              | 1.20E-04                | 0.69      | 0.69      |
| <b>Benzene</b>             | BENZENE    | 1.22E-12                                                            | 0                                                                    | 0                                                                     | 0                       | 1.93      | 0.67      |
| <b>2-methylfuran</b>       | MEFURAN    | 6.19E-11                                                            | 0                                                                    | 0                                                                     | 0                       | 1.35      | 0.64      |
| <b>Toluene</b>             | TOLUENE    | 5.59E-12                                                            | 0                                                                    | 0                                                                     | 0                       | 1.90      | 0.46      |
| <b>Isoprene</b>            | C5H8       | 9.91E-11                                                            | 1.33E-17                                                             | 7.03E-13                                                              | 0                       | 1.04      | 0.42      |
| <b>Methyl ethyl ketone</b> | MEK        | 1.11E-12                                                            | 0                                                                    | 0                                                                     | 4.55E-05                | 1.47      | 0.41      |
| <b>Acetic Anhydride</b>    | METHCOACET | 1.00E-14                                                            | 0                                                                    | 0                                                                     | 0                       | 0.33      | 0.30      |
| <b>p-benzoquinone</b>      | PBZQONE    | 4.60E-12                                                            | 0                                                                    | 3.00E-13                                                              | 0                       | 0.24      | 0.30      |
| <b>2,5-dimethylfuran</b>   | DIMEFURAN  | 1.32E-10                                                            | 0                                                                    | 0                                                                     | 0                       | 0.75      | 0.28      |
| <b>Methacrolein</b>        | MACR       | 2.84E-11                                                            | 1.28E-18                                                             | 3.40E-15                                                              | 7.72E-07                | 0.29      | 0.24      |
| <b>Benzaldehyde</b>        | BENZAL     | 1.25E-11                                                            | 0                                                                    | 2.40E-15                                                              | 1.1E-3                  | 0.28      | 0.19      |
| <b>2,3-dimethyl phenol</b> | OXYLOL     | 8.00E-11                                                            | 0                                                                    | 3.20E-11                                                              | 0                       | 0.71      | 0.16      |
| <b>Propenal</b>            | C4ALDB     | 3.40E-11                                                            | 1.58E-18                                                             | 6.00E-15                                                              | 5.56E-07                | 0.18      | 0.15      |
| <b>Styrene</b>             | STYRENE    | 5.80E-11                                                            | 1.70E-17                                                             | 1.50E-12                                                              | 0                       | 0.36      | 0.11      |
| <b>1-pentene</b>           | PENT1ENE   | 3.10E-11                                                            | 1.00E-17                                                             | 1.20E-14                                                              | 0                       | 0.34      | 0.10      |
| <b>m-xylene</b>            | MXYL       | 2.31E-11                                                            | 0                                                                    | 2.60E-16                                                              | 0                       | 0.26      | 0.09      |
| <b>p-xylene</b>            | PXYL       | 1.43E-11                                                            | 0                                                                    | 5.00E-16                                                              | 0                       | 0.26      | 0.09      |
| <b>o-xylene</b>            | OXYL       | 1.36E-11                                                            | 0                                                                    | 4.10E-16                                                              | 0                       | 0.17      | 0.06      |
| <b>Ethyl benzene</b>       | EBENZ      | 7.00E-12                                                            | 0                                                                    | 1.20E-16                                                              | 0                       | 0.08      | 0.03      |
| <b>NO2</b>                 | NO2        | 9.22E-12                                                            | 3.72E-17                                                             | 1.21E-12                                                              | 5.05E-05                | 6.46      | 53.98     |
| <b>O3</b>                  | O3         | 7.41E-14                                                            | 4.96E-02                                                             | 0                                                                     | 0                       | 5.00      | 10.00     |
| <b>HONO</b>                | HONO       | 5.95E-12                                                            | 0                                                                    | 0                                                                     | 5.90E-04                | 0.00      | 2.58      |
| <b>NO</b>                  | NO         | 8.97E-12                                                            | 1.78E-14                                                             | 2.60E-11                                                              | 0                       | 0.08      | 0.40      |

**Table S4.** Calculated NMOG losses by reaction with OH, O<sub>3</sub>, NO<sub>3</sub>, and photolysis for F26, F38, and the ambient biomass burning plume described by Müller et al. (2016). All values are percentages of the integrated loss over 15 hr of atmospheric-equivalent OH oxidation. Entries are ordered according to the largest loss rates by each process, calculated for F38. Entries marked by a hyphen were not included in the modeling.

*Primary Loss by OH*

|                            | F26 |                |                 |           | F38 |                |                 |           | Muller et al. (2016) |                |                 |           |
|----------------------------|-----|----------------|-----------------|-----------|-----|----------------|-----------------|-----------|----------------------|----------------|-----------------|-----------|
|                            | OH  | O <sub>3</sub> | NO <sub>3</sub> | <i>hν</i> | OH  | O <sub>3</sub> | NO <sub>3</sub> | <i>hν</i> | OH                   | O <sub>3</sub> | NO <sub>3</sub> | <i>hν</i> |
| <b>5-methylfurfural</b>    | 100 | 0              | 0               | 0         | 100 | 0              | 0               | 0         | 100                  | 0              | 0               | 0         |
| <b>2,5-dimethylfuran</b>   | 100 | 0              | 0               | 0         | 100 | 0              | 0               | 0         | 100                  | 0              | 0               | 0         |
| <b>Guaiacol</b>            | 100 | 0              | 0               | 0         | 100 | 0              | 0               | 0         | —                    | —              | —               | —         |
| <b>Furan</b>               | 100 | 0              | 0               | 0         | 100 | 0              | 0               | 0         | 100                  | 0              | 0               | 0         |
| <b>2-methylfuran</b>       | 100 | 0              | 0               | 0         | 100 | 0              | 0               | 0         | 100                  | 0              | 0               | 0         |
| <b>Acetic Acid</b>         | 100 | 0              | 0               | 0         | 100 | 0              | 0               | 0         | 100                  | 0              | 0               | 0         |
| <b>Propenoic acid</b>      | 100 | 0              | 0               | 0         | 100 | 0              | 0               | 0         | —                    | —              | —               | —         |
| <b>Acetic Anhydride</b>    | 100 | 0              | 0               | 0         | 100 | 0              | 0               | 0         | —                    | —              | —               | —         |
| <b>Methanol</b>            | 100 | 0              | 0               | 0         | 100 | 0              | 0               | 0         | —                    | —              | —               | —         |
| <b>Benzene</b>             | 100 | 0              | 0               | 0         | 100 | 0              | 0               | 0         | 100                  | 0              | 0               | 0         |
| <b>Toluene</b>             | 100 | 0              | 0               | 0         | 100 | 0              | 0               | 0         | —                    | —              | —               | —         |
| <b>Ethene</b>              | 100 | 0              | 0               | 0         | 100 | 0              | 0               | 0         | 97                   | 3              | 0               | 0         |
| <b>Formic Acid</b>         | 100 | 0              | 0               | 0         | 100 | 0              | 0               | 0         | 100                  | 0              | 0               | 0         |
| <b>Ethanol</b>             | 100 | 0              | 0               | 0         | 100 | 0              | 0               | 0         | —                    | —              | —               | —         |
| <b>Methyl acetate</b>      | 100 | 0              | 0               | 0         | 100 | 0              | 0               | 0         | —                    | —              | —               | —         |
| <b>m-xylene</b>            | 100 | 0              | 0               | 0         | 100 | 0              | 0               | 0         | —                    | —              | —               | —         |
| <b>Ethyl benzene</b>       | 100 | 0              | 0               | 0         | 100 | 0              | 0               | 0         | —                    | —              | —               | —         |
| <b>o-xylene</b>            | 100 | 0              | 0               | 0         | 100 | 0              | 0               | 0         | —                    | —              | —               | —         |
| <b>p-xylene</b>            | 100 | 0              | 0               | 0         | 100 | 0              | 0               | 0         | —                    | —              | —               | —         |
| <b>Acrolein</b>            | 100 | 0              | 0               | 0         | 100 | 0              | 0               | 0         | —                    | —              | —               | —         |
| <b>Methacrolein</b>        | 100 | 0              | 0               | 0         | 100 | 0              | 0               | 0         | 97                   | 1              | 0               | 3         |
| <b>Propenal</b>            | 100 | 0              | 0               | 0         | 100 | 0              | 0               | 0         | —                    | —              | —               | —         |
| <b>1,3-butadiene</b>       | 100 | 0              | 0               | 0         | 100 | 0              | 0               | 0         | —                    | —              | —               | —         |
| <b>Ethyne</b>              | 100 | 0              | 0               | 0         | 100 | 0              | 0               | 0         | —                    | —              | —               | —         |
| <b>Isoprene</b>            | 100 | 0              | 0               | 0         | 100 | 0              | 0               | 0         | 98                   | 2              | 0               | 0         |
| <b>1-pentene</b>           | 100 | 0              | 0               | 0         | 100 | 0              | 0               | 0         | —                    | —              | —               | —         |
| <b>1-butene</b>            | 100 | 0              | 0               | 0         | 100 | 0              | 0               | 0         | —                    | —              | —               | —         |
| <b>1-propene</b>           | 100 | 0              | 0               | 0         | 100 | 0              | 0               | 0         | 96                   | 4              | 0               | 0         |
| <b>Methyl vinyl ketone</b> | 99  | 0              | 0               | 1         | 99  | 0              | 0               | 1         | 93                   | 4              | 0               | 3         |
| <b>Furanone</b>            | 100 | 0              | 0               | 0         | 99  | 0              | 1               | 0         | 100                  | 0              | 0               | 0         |
| <b>Styrene</b>             | 100 | 0              | 0               | 0         | 98  | 0              | 2               | 0         | 96                   | 3              | 1               | 0         |



**Table S4.** (Continued)

*Significant loss by NO3*

|                            | F26 |                |                 |           | F38 |                |                 |           | Muller et al. (2016) |                |                 |           |
|----------------------------|-----|----------------|-----------------|-----------|-----|----------------|-----------------|-----------|----------------------|----------------|-----------------|-----------|
|                            | OH  | O <sub>3</sub> | NO <sub>3</sub> | <i>hν</i> | OH  | O <sub>3</sub> | NO <sub>3</sub> | <i>hν</i> | OH                   | O <sub>3</sub> | NO <sub>3</sub> | <i>hν</i> |
| <b>Catechol</b>            | 93  | 0              | 7               | 0         | 66  | 0              | 34              | 0         | 82                   | 1              | 17              | 0         |
| <b>o-cresol</b>            | 98  | 0              | 2               | 0         | 83  | 0              | 17              | 0         | 94                   | 0              | 6               | 0         |
| <b>2,3-dimethyl phenol</b> | 98  | 0              | 2               | 0         | 84  | 0              | 16              | 0         | —                    | —              | —               | —         |
| <b>p-benzoquinone</b>      | 99  | 0              | 1               | 0         | 91  | 0              | 9               | 0         | —                    | —              | —               | —         |
| <b>Phenol</b>              | 99  | 0              | 1               | 0         | 88  | 0              | 12              | 0         | 97                   | 0              | 3               | 0         |
| <b>monoterpenes</b>        | 98  | 1              | 1               | 0         | 92  | 1              | 7               | 0         | —                    | —              | —               | —         |

*Significant loss by photolysis*

|                            | F26 |                |                 |           | F38 |                |                 |           | Muller et al. (2016) |                |                 |           |
|----------------------------|-----|----------------|-----------------|-----------|-----|----------------|-----------------|-----------|----------------------|----------------|-----------------|-----------|
|                            | OH  | O <sub>3</sub> | NO <sub>3</sub> | <i>hν</i> | OH  | O <sub>3</sub> | NO <sub>3</sub> | <i>hν</i> | OH                   | O <sub>3</sub> | NO <sub>3</sub> | <i>hν</i> |
| <b>2-furfural</b>          | 0   | 0              | 0               | 100       | 1   | 0              | 0               | 99        | 99                   | 0              | 0               | 1         |
| <b>Acetone</b>             | 18  | 0              | 0               | 82        | 16  | 0              | 0               | 84        | 77                   | 0              | 0               | 23        |
| <b>2,3-butanedione</b>     | 48  | 0              | 0               | 52        | 46  | 0              | 0               | 54        | 1                    | 0              | 0               | 99        |
| <b>Methyl ethyl ketone</b> | 70  | 0              | 0               | 30        | 68  | 0              | 0               | 32        | —                    | —              | —               | —         |
| <b>Benzaldehyde</b>        | 74  | 0              | 0               | 26        | 73  | 0              | 0               | 27        | —                    | —              | —               | —         |
| <b>Hydroxyacetone</b>      | 93  | 0              | 0               | 7         | 91  | 0              | 0               | 9         | 88                   | 0              | 0               | 12        |
| <b>Methyl glyoxal</b>      | 93  | 0              | 0               | 7         | 91  | 0              | 0               | 9         | —                    | —              | —               | —         |
| <b>Glyoxal</b>             | 95  | 0              | 0               | 5         | 93  | 0              | 0               | 7         | —                    | —              | —               | —         |
| <b>Formaldehyde</b>        | 99  | 0              | 0               | 1         | 98  | 0              | 0               | 2         | 39                   | 0              | 0               | 61        |
| <b>Acetaldehyde</b>        | 98  | 0              | 0               | 2         | 98  | 0              | 0               | 2         | 95                   | 0              | 0               | 5         |

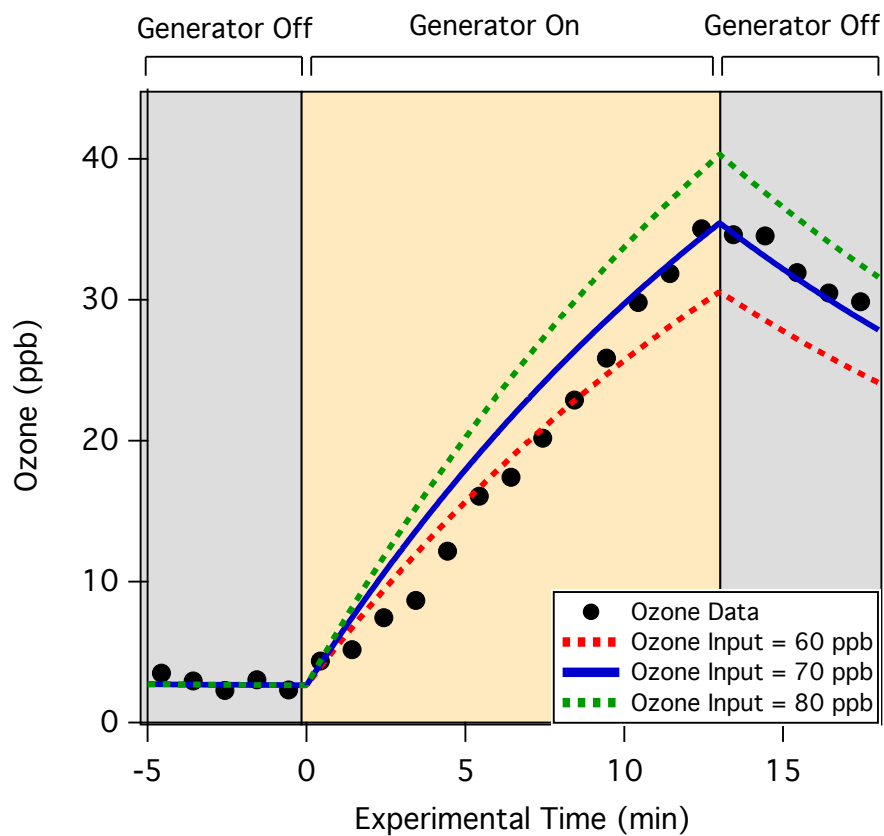

**Figure S1.** Modeled ozone compared to ozone measured during a dark, low NMOG ( $< 70$  ppb) experiment. Output from the model is shown assuming that the dilution stream contains 60, 70, and 80 ppb of ozone. The input of ozone with the best fit (70 ppb) is applied to the photochemistry model described in Section 2.4

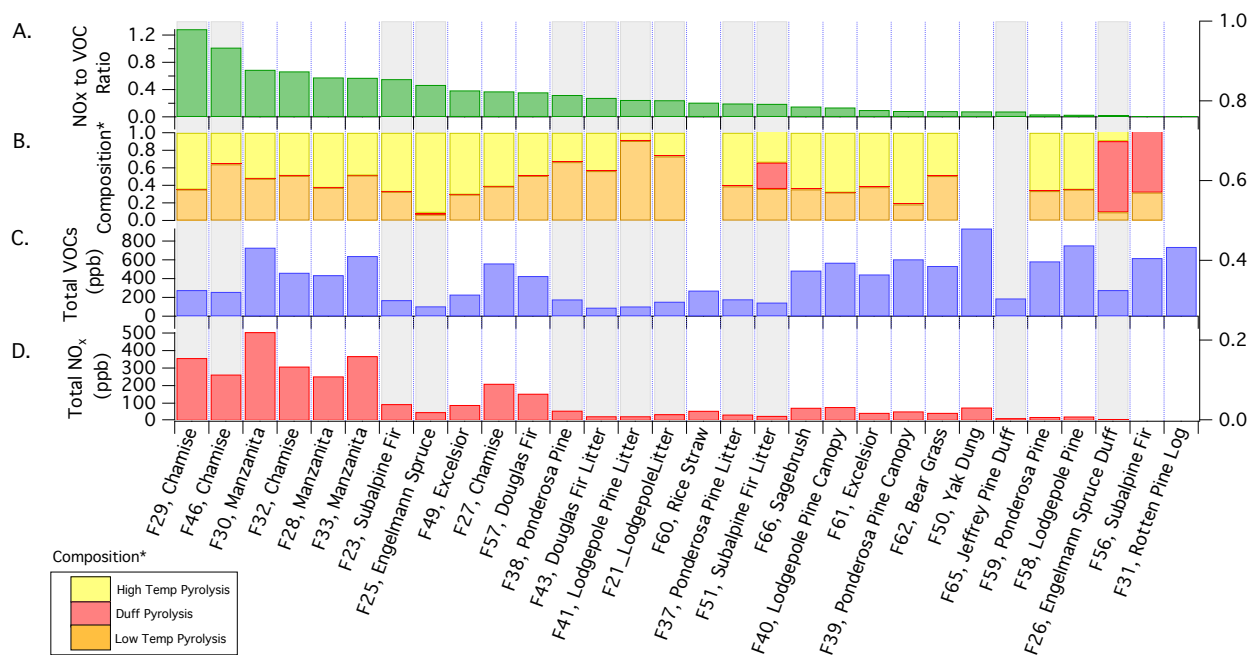

**Figure S2.** Small chamber (A) NO<sub>x</sub>/NMOG ratio, (B) NMOG composition, (C) total NMOG loading, and (D) total NO<sub>x</sub> prior to photochemical oxidation. Panel B shows the fraction of the total NMOG signal attributable to high temperature, low temperature, and duff pyrolysis as defined by Sekimoto et al. (2017). The grey bars indicate experiments in which initial NMOG loadings are sufficiently low to avoid significant OH titration.

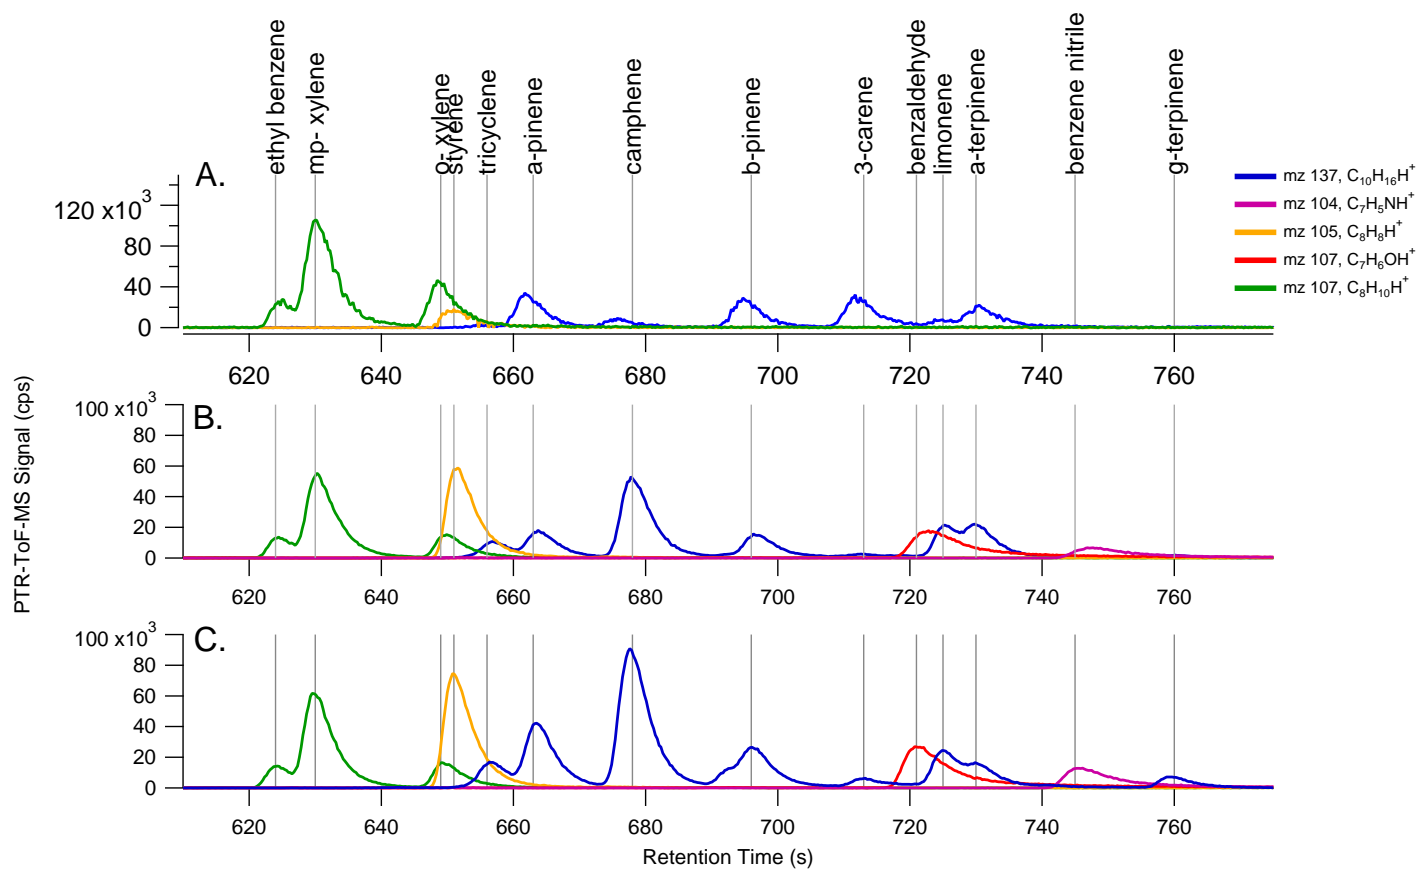

**Figure S3.** Distribution of monoterpenes ( $m/z$  137) and other select NMOG measured from the combustion of (A) Engelmann spruce, (B) Douglas fir, and (C) subalpine fir using GC-PTR-ToF-MS.

## Furan Reactions

— OH reactions  
— RO2 reactions  
— Photolysis Reactions

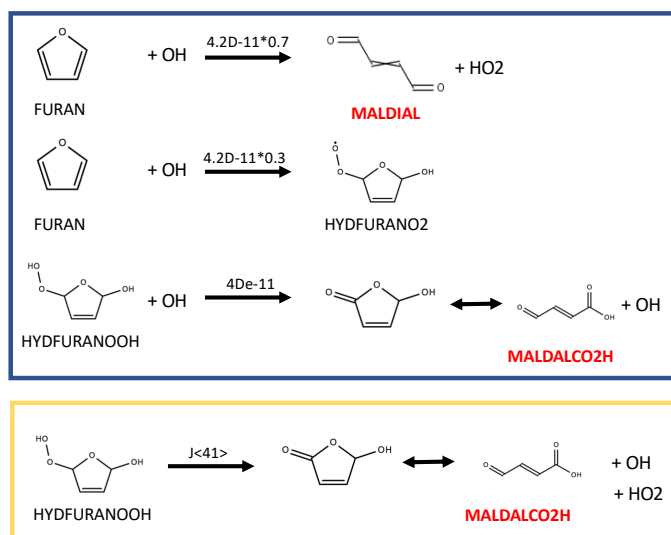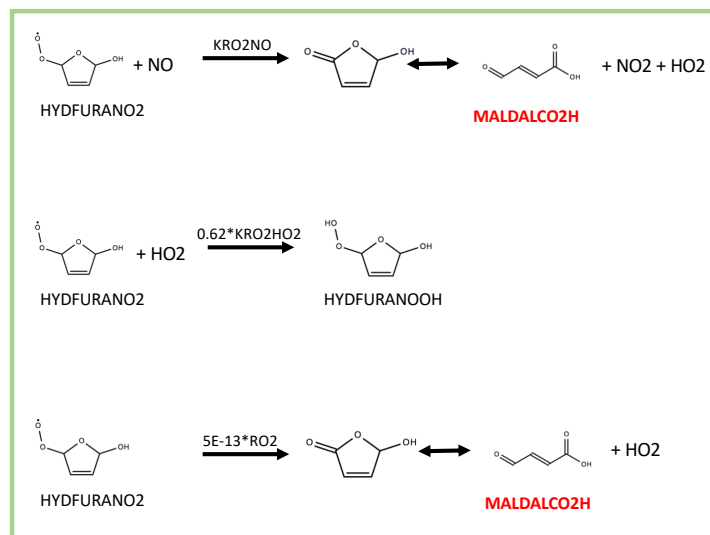

**Figure S4.** Furan reactions implemented into the MCM box model. Reactions are based on mechanism reported by Aschmann et al. (2014). Names in red indicate species currently represented in MCM v 3.3.1.

# Methyl Furan Reactions

— OH reactions  
— RO<sub>2</sub> reactions  
— Photolysis Reactions

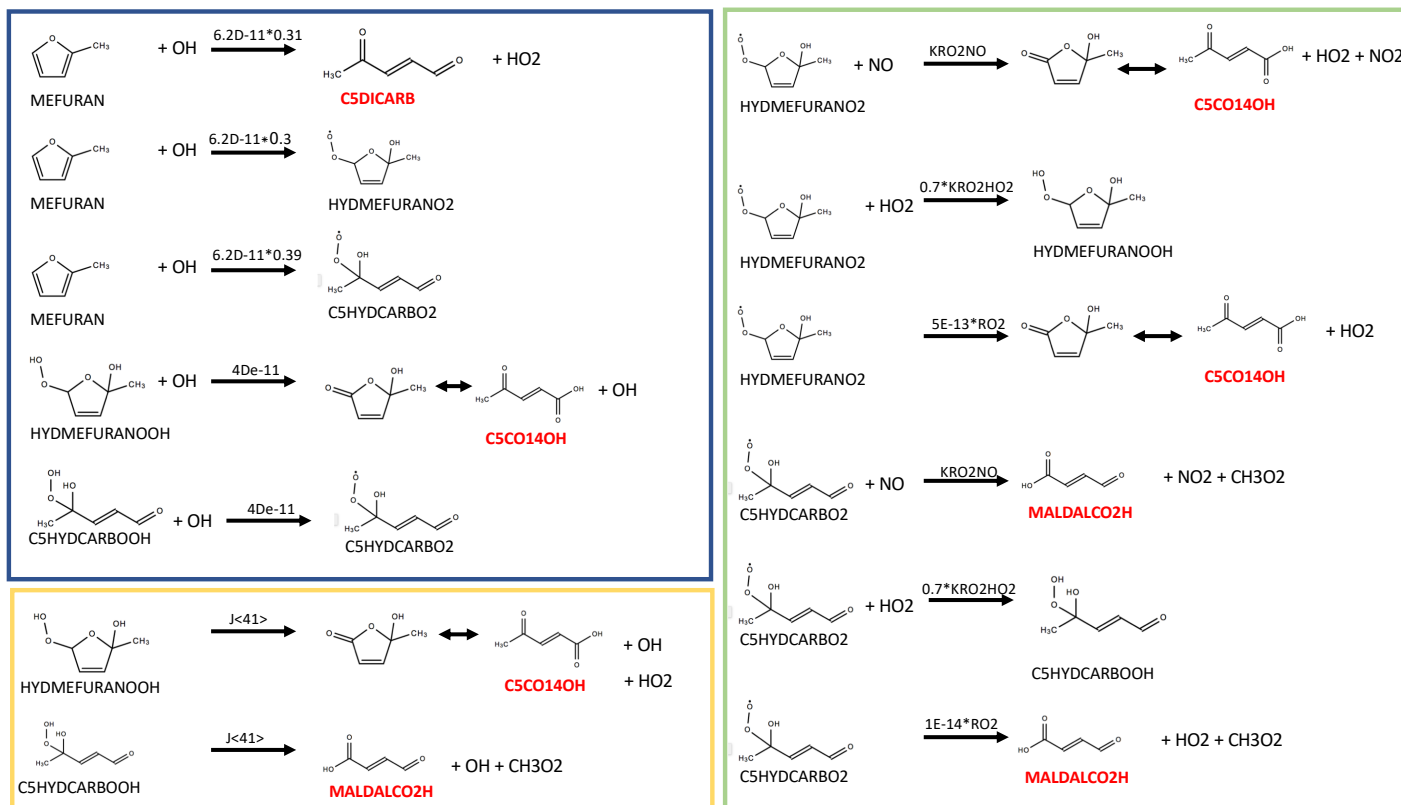

**Figure S5.** 2-methylfuran reactions implemented into the MCM box model. Reactions are based on mechanism reported by Aschmann et al. (2014). Names in red indicate species currently represented in MCM v 3.3.1.

## Dimethyl Furan Reactions

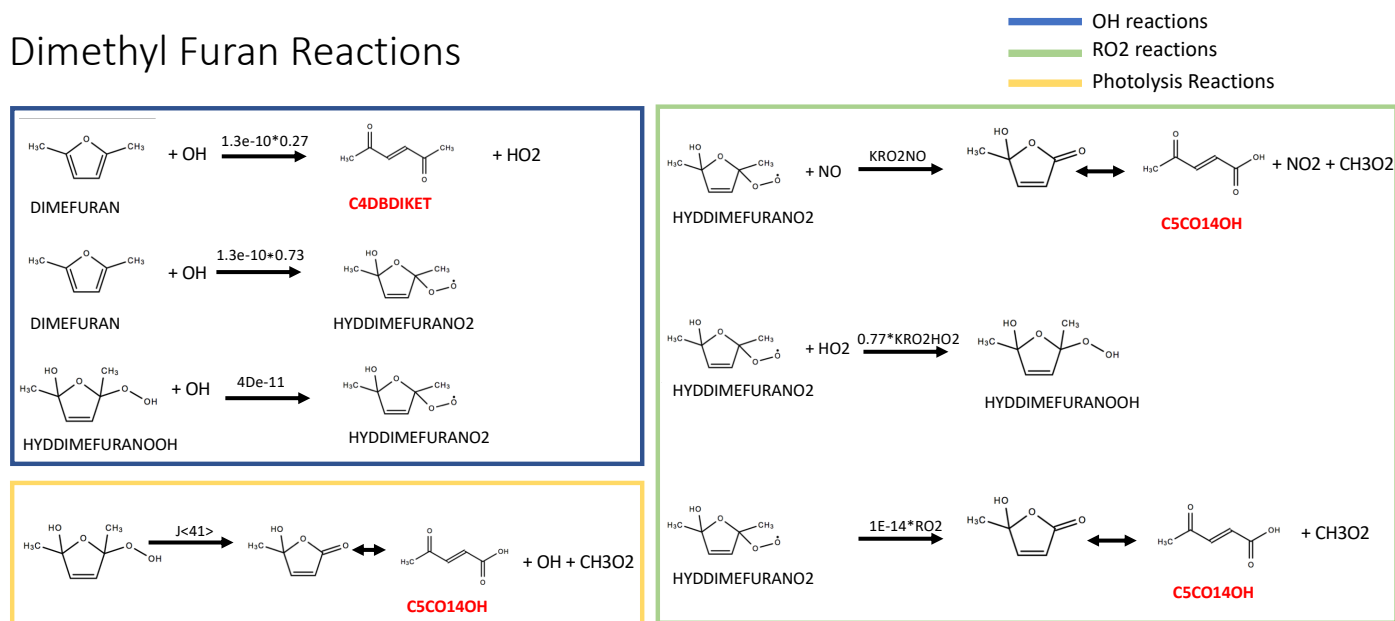

**Figure S6.** 2,5-dimethylfuran reactions implemented into the MCM box model. Reactions are based on mechanism reported by Aschmann et al. (2014). Names in red indicate species currently represented in MCM v 3.3.1.

## Furfural Reactions

— OH reactions  
— RO<sub>2</sub> reactions  
— Photolysis Reactions

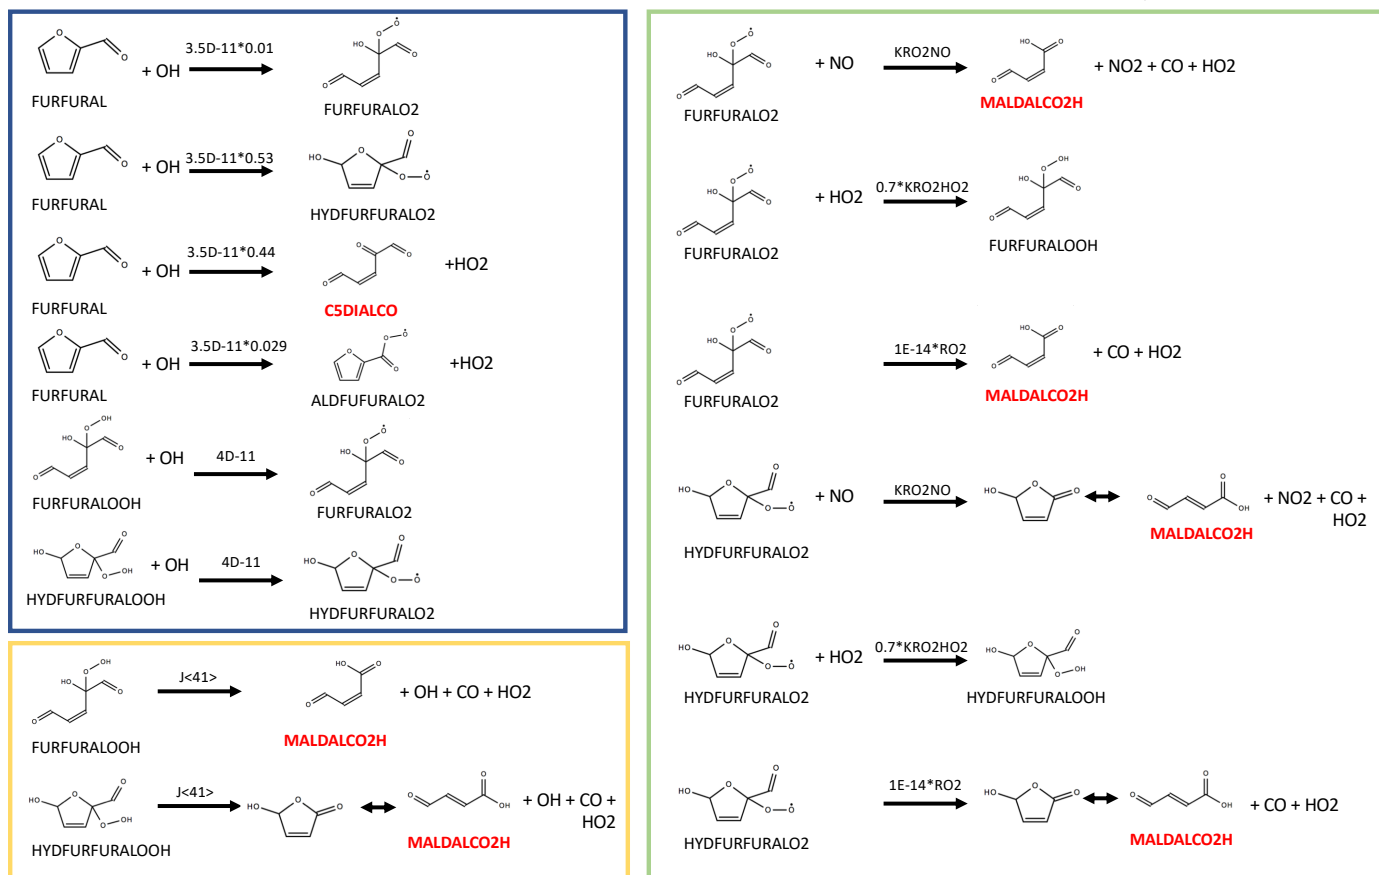

**Figure S7.** Furfural reactions implemented into the MCM box model. Reactions are based on mechanism reported by Zhao and Wang (2017). Names in red indicate species currently represented in MCM v 3.3.1.



## Furfural Reactions (Continued)

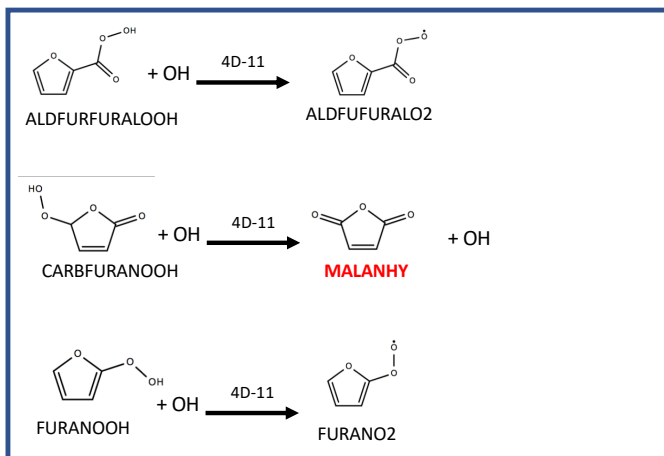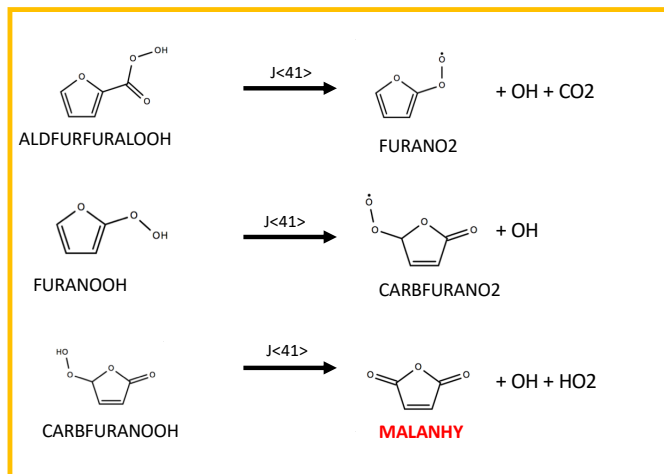

OH reactions  
RO2 reactions  
Photolysis Reactions

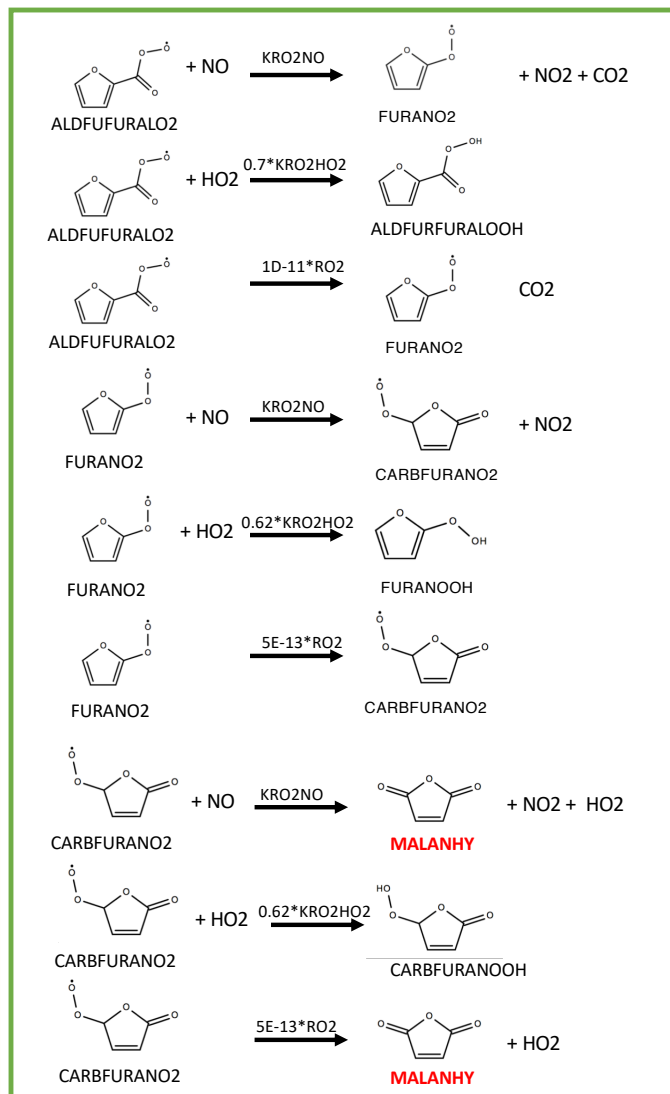

**Figure S8.** Furfural reactions implemented into the MCM box model (continued from Fig. S7). Reactions are based on mechanism reported by Zhao and Wang (2017). Names in red indicate species currently represented in MCM v 3.3.1.

# Methyl Furfural Reactions

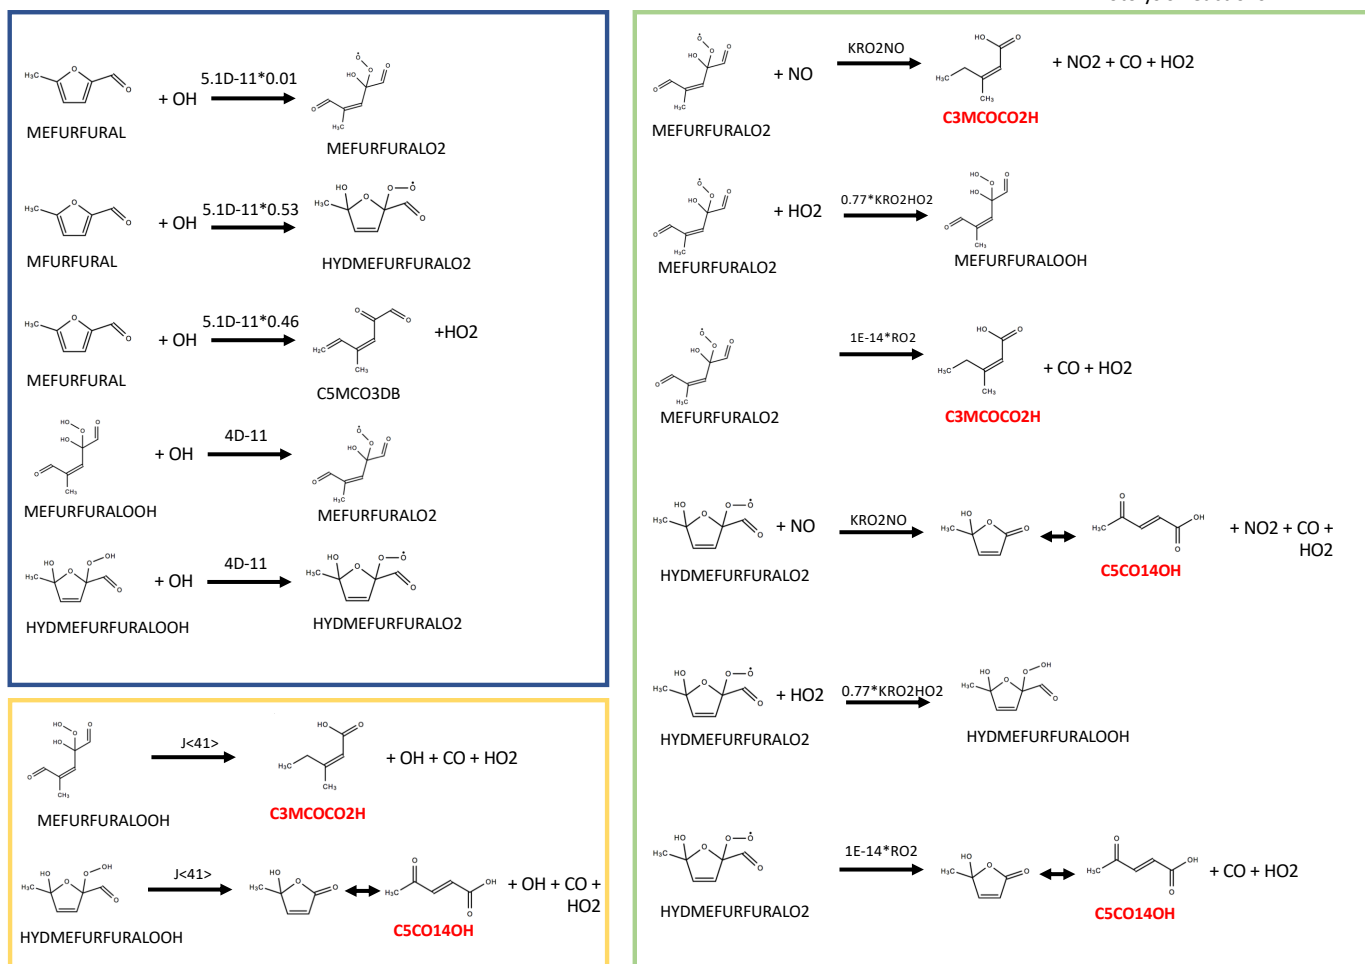

**Figure S9.** 5-methylfurfural reactions implemented into the MCM box model. Products and branching ratios are assumed to follow pathways analogous to the furfural mechanism reported by Zhao and Wang (2017). Names in red indicate species currently represented in MCM v 3.3.1.

## Guaiacol Reactions

OH reactions  
RO2 reactions

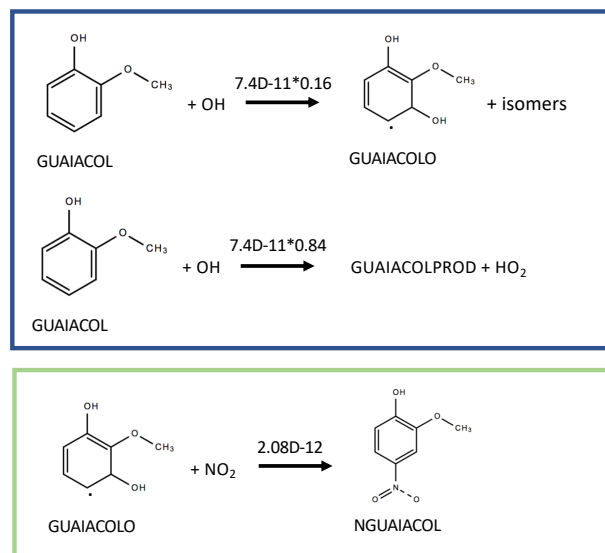

**Figure S10.** Guaiacol reactions implemented into the MCM box model. Reactions are based on the guaiacol mechanism reported by Lauraguais et al. (2014). GUAIALCOLPROD is a generic, non-reactive product that is included to account for the fraction of guaiacol that does not react to form nitroguaiacols

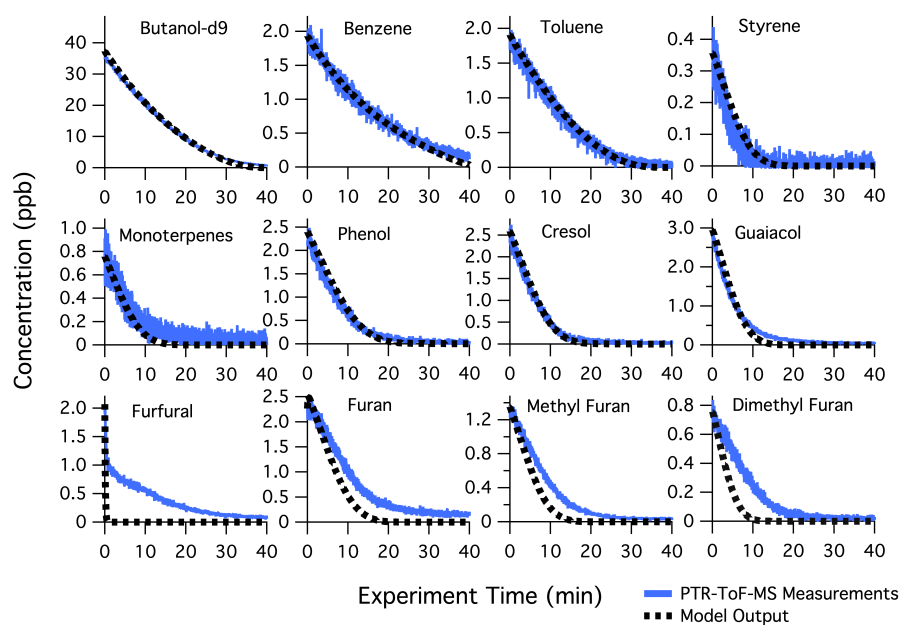

**Figure S11.** Primary NMOG measurements (blue lines) compared to modeled output (black dotted lines) for Fire 26. Fuel = Englemann Spruce Duff,  $\text{NO}_x/\text{NMOG} = 0.02$ , primarily duff pyrolysis NMOG mixture.

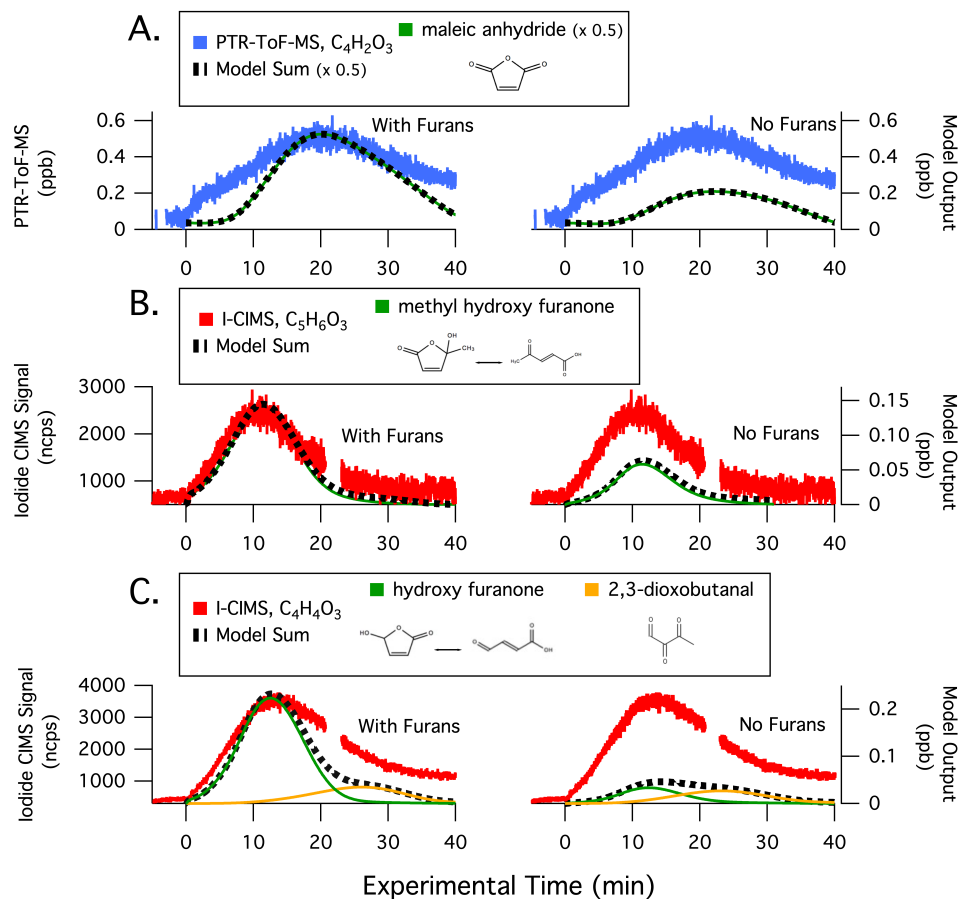

**Figure S12.** Secondary NMOG measurements compared to modeled output for Fire 26. Row (A) shows PTR-ToF-MS measurements of  $C_4H_2O_3$  compared to model output of maleic anhydride. Row (B) shows I-ToF-CIMS measurements of  $C_5H_6O_3$  compared to model output of methyl hydroxy furanone and its tautomer,  $\beta$ -acetylacrylic acid. Row (C) shows I-ToF-CIMS measurements of  $C_4H_4O_3$  compared to model output of hydroxy furanone, its tautomer malealdehydic acid, and 2,3-dioxobutanal. All graphs to the left show full model runs, while graphs to the right show model runs when the initial conditions of furan, 2-methylfuran, 2,5-dimethylfuran, furfural, 5-methylfurfural, and furanone are set to zero

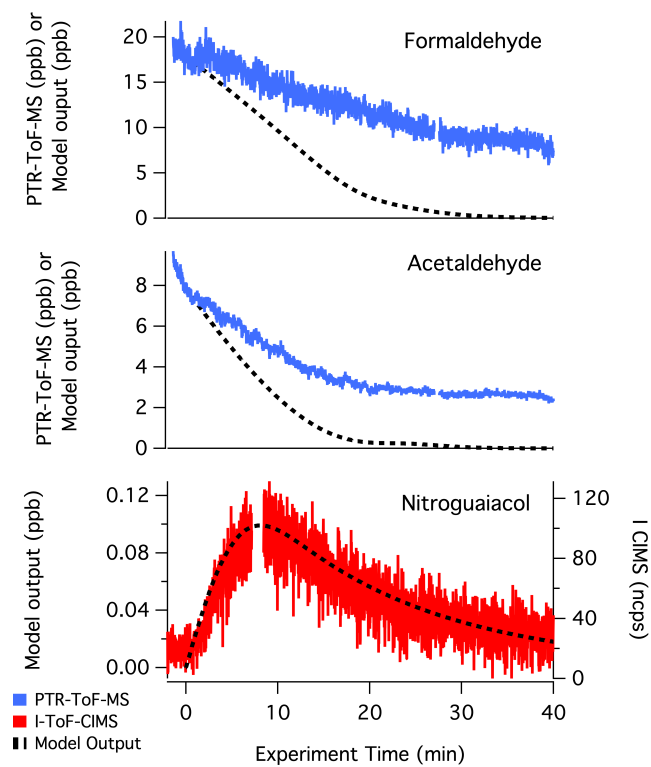

**Figure S13.** PTR-ToF-MS and  $I^-$ -ToF-CIMS measurements of formaldehyde, acetaldehyde, and nitroguaiacol compared to model output for F38.

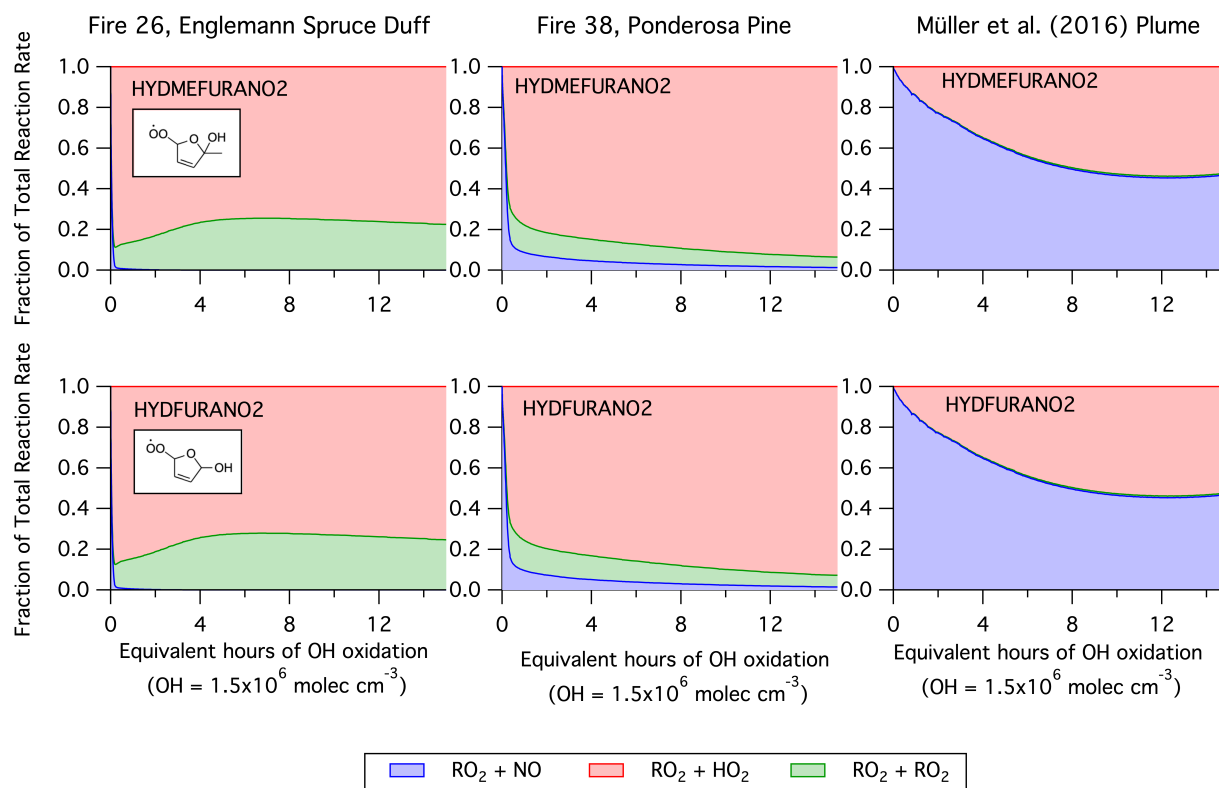

**Figure S14.** Fate of  $\text{RO}_2$  species that lead to the formation of hydroxy furanone and methyl hydroxy furanone for F26, F38, and the ambient plume described by Müller et al. (2016). Shown is the fraction of  $\text{RO}_2$  loss associated with reactions with  $\text{HO}_2$ ,  $\text{NO}$ , and other  $\text{RO}_2$  radicals.

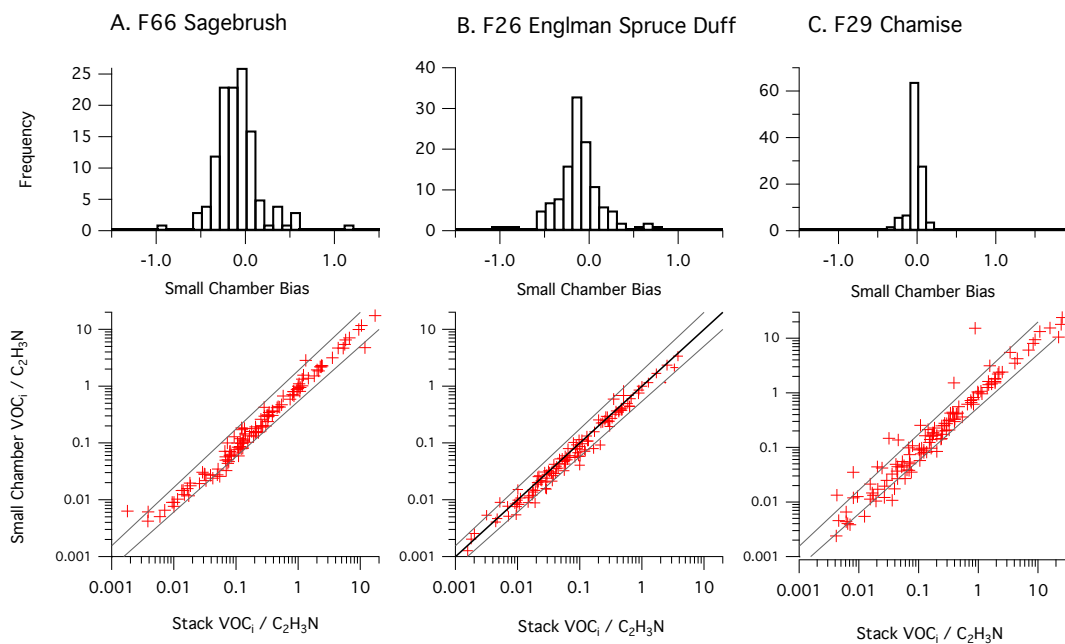

**Figure S15.** Comparison of NMOG distributions measured in the stack and small chamber prior to OH oxidation for (A) F66 - Sagebrush, (B) F26 - Englemann Spruce Duff, and (C) F29 Chamise. The bottom row shows the NMOG/C<sub>2</sub>H<sub>3</sub>N ratio for each species measured by the PTR-ToF-MS, along with 1:1, 2:1, and 1:2 lines.



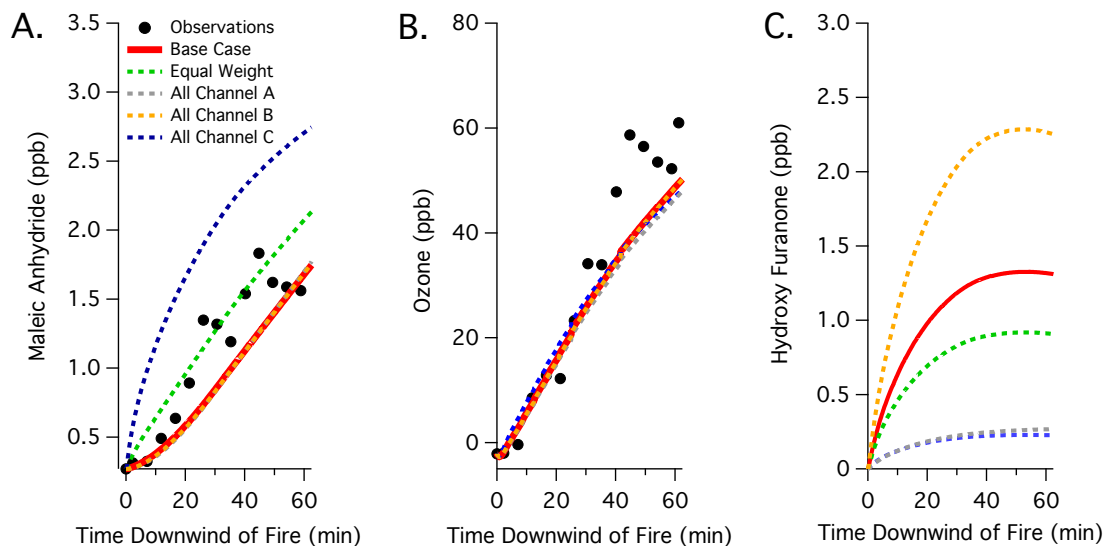

**Figure S16.** Model sensitivity of (A) maleic anhydride, (B) ozone, and (C) hydroxyfuranone to the assumed branching ratios of the furfural mechanism (Fig. 6). The "base case" simulation assumes branching ratios of  $A = 0.37$ ,  $B = 0.6$ ,  $C = 0.03$  while the "equal weight" simulation assumes  $A = 0.33$ ,  $B = 0.33$ ,  $C = 0.33$ . All other simulations assume that furfural loss follows a single channel (i.e., all channel A, B, or C). Model output are compared to the measurements of maleic anhydride and ozone reported by Müller et al. (2016). Measurements of hydroxy furanone are not available.
